# Supplementary material for: T2–FLAIR Mismatch, an Imaging Biomarker for IDH and 1p/19q Status in Lower-grade Gliomas: A TCGA/TCIA Project
Source: Oxford University Press journal article supplement (doi:10.1158/1078-0432.ccr-17-0560), 2017-07-27
Supplement: 10780432ccr170560-sup-179542_3_supp_4148236_sssqsf.xlsx [file 10780432ccr170560-sup-179542_3_supp_4148236_sssqsf.xlsx]

## Sheet: proteinmismatchnoncodel (1)
Protein ID	Mismatch	No Mismatch	Mean difference	P-value	Ädj P-value
MTOR_mTOR	0.20635	0.0387186	0.167631	0.00183227	0.3463
ACACA_ACC1	0.139225	-0.157426	0.29665	0.00672725	0.635725
SRSF1_SF2	0.205433	-0.0579933	0.263427	0.0125001	0.68543
SRC_Src	0.202667	-0.0251324	0.227799	0.0167131	0.68543
G6PD_G6PD	-0.0750916	0.00801917	-0.0831108	0.019417	0.68543
MET_c_Met_pY1235	0.0571497	-0.0291168	0.0862665	0.0251293	0.68543
FASN_FASN	0.0477482	-0.141744	0.189492	0.0253863	0.68543
VHL_VHL	-0.153915	-0.00801395	-0.145901	0.0334383	0.740179
RICTOR_Rictor	0.119076	-0.00709453	0.126171	0.0373831	0.740179
RPTOR_Raptor	0.130143	-0.00934228	0.139485	0.0421663	0.740179
FOXO3_FOXO3a	0.130176	-0.0411764	0.171352	0.0439643	0.740179
MYH9_Myosin_IIa_pS1943	-0.224785	0.175316	-0.400101	0.0482836	0.740179
TTF1_TTF1	-0.0572403	0.103193	-0.160434	0.0519478	0.740179
ANXA1_Annexin_1	-0.137949	0.201656	-0.339605	0.0548281	0.740179
SMAD1_Smad1	0.159908	0.0150027	0.144905	0.0659257	0.740676
DVL3_Dvl3	0.111706	0.00136685	0.110339	0.0682393	0.740676
CDKN1B_p27	0.159904	-0.0341798	0.194084	0.0761579	0.740676
EGFR_EGFR	0.155016	-0.0357622	0.190778	0.076634	0.740676
PECAM1_CD31	-0.0665379	0.0291906	-0.0957285	0.0824121	0.740676
FOXM1_FoxM1	-0.0154617	0.0893378	-0.1048	0.0826178	0.740676
PEA15_PEA15	0.31988	0.110113	0.209767	0.0860921	0.740676
ARAF_A_Raf_pS299	-0.0425997	0.0378262	-0.0804259	0.0862163	0.740676
TFRC_TFRC	-0.195775	0.0677524	-0.263527	0.103126	0.797168
ITGA2_CD49b	0.307272	0.0791916	0.228081	0.104508	0.797168
PIK3CA__PI3K_p110_alpha	0.0210192	-0.0580713	0.0790904	0.107742	0.797168
SQSTM1_p62_LCK_ligand	-0.132091	-0.0402875	-0.0918034	0.113231	0.797168
RAF1_C_Raf	0.0536635	-0.037641	0.0913045	0.113881	0.797168
ESR1_ER_alpha_pS118	0.0129616	-0.0380724	0.051034	0.134576	0.872315
PARK7_DJ_1	0.173426	0.0907686	0.0826574	0.143109	0.872315
CDKN1A_p21	0.0447769	-0.088081	0.132858	0.14461	0.872315
INPP4B_INPP4B	-0.0573335	0.0794335	-0.136767	0.153361	0.872315
BAD_Bad_pS112	0.0486295	-0.0199221	0.0685516	0.160392	0.872315
PRKCA__PKC_alpha_pS657	0.187553	-0.0111553	0.198708	0.161824	0.872315
YWHAE_14_3_3_epsilon	0.0278548	0.110459	-0.0826044	0.177206	0.872315
ATM_ATM	0.0777212	-0.0807571	0.158478	0.180182	0.872315
EGFR_EGFR_pY1173	0.00374263	-0.0399355	0.0436781	0.184315	0.872315
EIF4G1_eIF4G	0.00967506	-0.0876069	0.097282	0.188574	0.872315
RAB25_Rab25	-0.0591173	0.00990184	-0.0690191	0.205902	0.872315
PEA15_PEA15_pS116	0.152338	0.339994	-0.187656	0.211378	0.872315
EEF2_eEF2	0.010193	0.113509	-0.103316	0.212465	0.872315
NOTCH1_Notch1	-0.0116412	-0.0825534	0.0709122	0.218392	0.872315
NFKB1_NF_kB_p65_pS536	-0.0495744	0.108378	-0.157952	0.221798	0.872315
ACACA_ACACB_ACC_pS79	-0.0066714	-0.134119	0.127447	0.227299	0.872315
TSC1_TSC1	0.0892334	-0.0645584	0.153792	0.230338	0.872315
SYK_Syk	0.392777	0.226632	0.166145	0.2319	0.872315
ETS1_ETS_1	0.020187	0.167783	-0.147596	0.236749	0.872315
TP53BP1_53BP1	0.108529	-0.046516	0.155045	0.239669	0.872315
MYC_c_Myc	-0.086034	0.120369	-0.206403	0.241023	0.872315
GAPDH_GAPDH	-0.0854166	0.0561737	-0.14159	0.245329	0.872315
CASP7_Caspase_7_cleavedD198	-0.00288379	0.0496095	-0.0524933	0.245643	0.872315
GATA3_GATA3	-0.0159725	0.0606582	-0.0766307	0.245792	0.872315
PRDX1_PRDX1	-0.0182567	0.0794781	-0.0977348	0.250665	0.872315
NDRG1_NDRG1_pT346	-0.152633	-0.0167342	-0.135899	0.254131	0.872315
NRG1_Heregulin	-0.0858155	-0.0267119	-0.0591036	0.255249	0.872315
ESR1_ER_alpha	-0.000231828	0.0621779	-0.0624097	0.256648	0.872315
CHEK2_Chk2	0.0212843	0.0942148	-0.0729305	0.258464	0.872315
CTNNB1_beta_Catenin	0.152067	-0.000415437	0.152482	0.267918	0.880512
RAF1_C_Raf_pS338	0.0146691	0.0613844	-0.0467153	0.276333	0.880512
CCNE2_Cyclin_E2	-0.0312419	0.00893535	-0.0401772	0.277503	0.880512
TGM2_Transglutaminase	-0.0341076	0.00115798	-0.0352656	0.282014	0.880512
BIRC2__cIAP	0.0231788	-0.0278022	0.050981	0.2881	0.880512
CDH3_P_Cadherin	0.00747218	0.0652409	-0.0577687	0.289986	0.880512
ERBB2_HER2	-0.120205	-0.0796	-0.0406054	0.29658	0.880512
XRCC5_Ku80	0.108324	-0.0135371	0.121862	0.302908	0.880512
EIF4EBP1_4E_BP1	0.0678914	-0.0226834	0.0905748	0.30952	0.880512
ADAR_ADAR1	0.0157343	0.0764382	-0.0607039	0.311308	0.880512
EGFR_EGFR_pY1068	0.0677099	-0.0263412	0.0940511	0.312139	0.880512
CAV1_Caveolin_1	0.076798	0.356038	-0.27924	0.31697	0.880989
RAB11A_RAB11B_Rab11	0.0134936	0.0586196	-0.045126	0.33325	0.884117
PRKCA__PKC_alpha	0.127124	-0.00789882	0.135023	0.334106	0.884117
STAT3_STAT3_pY705	0.313674	0.114459	0.199215	0.342919	0.884117
MTOR_mTOR_pS2448	0.136802	0.0616896	0.0751129	0.345827	0.884117
EIF4E_eIF4E	0.026862	-0.0146936	0.0415556	0.349956	0.884117
BAP1_Bap1_c_4	-0.00581973	-0.0565202	0.0507005	0.350257	0.884117
TP53_p53	0.0307168	0.092446	-0.0617292	0.357771	0.884117
RICTOR_Rictor_pT1135	0.0974639	0.0406675	0.0567965	0.362673	0.884117
CDKN1B_p27_pT198	-0.0171374	-0.0448677	0.0277303	0.372352	0.884117
PCNA_PCNA	-0.0635961	-0.0394865	-0.0241096	0.373098	0.884117
PIK3R1_PIK3R2_PI3K_p85	0.0576752	-0.0034195	0.0610947	0.37374	0.884117
BCL2L11_Bim	0.148808	0.0712326	0.0775755	0.378286	0.884117
MRE11A_Mre11	-0.0104836	0.0227522	-0.0332357	0.378907	0.884117
PGR_PR	-0.00996341	0.0168134	-0.0267768	0.389539	0.897302
RPS6_S6_pS240_S244	-0.0666859	0.00622018	-0.072906	0.394053	0.897302
YWHAB_14_3_3_beta	-0.032652	0.0237472	-0.0563992	0.40045	0.901013
CHEK1_Chk1	-0.0214648	0.0101572	-0.031622	0.418217	0.929918
CTNNA1_alpha_Catenin	0.109232	0.0138567	0.0953756	0.425846	0.935871
IGFBP2_IGFBP2	-0.190529	-0.0809826	-0.109547	0.434939	0.94108
HSPA1A_HSP70	0.175397	0.407982	-0.232585	0.439833	0.94108
CDH2_N_Cadherin	0.094162	0.0393586	0.0548034	0.452151	0.94108
YWHAZ_14_3_3_zeta	0.000405318	0.0822664	-0.0818611	0.453885	0.94108
MAPK8_JNK_pT183_pY185	0.00632872	0.0824473	-0.0761186	0.460245	0.94108
CDH1_E_Cadherin	0.382439	0.230359	0.152081	0.4637	0.94108
IRS1_IRS1	-0.0657982	-0.0332193	-0.0325789	0.468478	0.94108
EEF2K_eEF2K	0.0810533	0.0185321	0.0625212	0.468942	0.94108
FOXO3_FOXO3a_pS318_S321	-0.0706135	-0.0345412	-0.0360724	0.47303	0.94108
MAPK14_p38_MAPK	0.179585	0.0974104	0.0821751	0.480423	0.945832
SMAD4_Smad4	0.0432217	0.0162931	0.0269286	0.486162	0.946466
CCNE1_Cyclin_E1	0.11042	0.0647904	0.0456296	0.492268	0.946466
SHC1_Shc_pY317	-0.0471171	-0.00568789	-0.0414292	0.495768	0.946466
PREX1_PREX1	0.0578315	-0.0350518	0.0928833	0.506865	0.956937
YBX1_YB_1	-0.0218835	0.02315	-0.0450335	0.522909	0.956937
MAPK1_MAPK3_MAPK_pT202_Y204	0.255969	0.0441395	0.21183	0.525418	0.956937
TSC2_Tuberin	-0.0610526	-0.141249	0.0801967	0.529131	0.956937
MYH11_MYH11	0.0383305	0.128535	-0.0902046	0.530181	0.956937
AKT1_AKT2_AKT3_Akt	0.0364779	-0.0318995	0.0683774	0.544911	0.956937
KDR_VEGFR2	0.0238987	0.0868701	-0.0629715	0.546233	0.956937
BCL2_Bcl_2	-0.00627898	0.047418	-0.053697	0.549951	0.956937
PXN_Paxillin	-0.0162984	0.0359246	-0.052223	0.551219	0.956937
RBM15_RBM15	0.121104	0.0447824	0.0763221	0.552743	0.956937
CHEK1_Chk1_pS345	-0.0336659	-0.00413317	-0.0295327	0.571819	0.956937
NRAS_N_Ras	-0.0342802	-0.0102586	-0.0240216	0.574802	0.956937
GSK3A_GSK3B_GSK3_alpha_beta	-0.080652	-0.00925707	-0.0713949	0.57532	0.956937
MAPK14_p38_pT180_Y182	0.101079	0.019825	0.0812545	0.575513	0.956937
AR_AR	0.104793	0.0655795	0.0392132	0.588364	0.956937
RAD50_Rad50	0.0845874	0.0335058	0.0510816	0.591336	0.956937
ERBB2_HER2_pY1248	-0.0112247	-0.0398166	0.0285919	0.591801	0.956937
NF2_NF2	0.13329	0.0833624	0.0499278	0.602592	0.956937
ERBB3_HER3_pY1289	0.0707349	0.0255649	0.04517	0.611898	0.956937
SRC_Src_pY527	0.233075	0.143898	0.0891768	0.620254	0.956937
RPS6KB1_p70S6K_pT389	0.0379938	0.170907	-0.132913	0.627197	0.956937
CDKN1B_p27_pT157	-0.0413197	-0.0288906	-0.0124291	0.630379	0.956937
ERRFI1_MIG_6	-0.077608	-0.0572746	-0.0203334	0.641044	0.956937
PRKCD_PKC_delta_pS664	0.061672	-0.0105035	0.0721755	0.64834	0.956937
MAPK1_ERK2	0.212662	0.275736	-0.0630742	0.648835	0.956937
RAD51_Rad51	0.0295675	0.0905173	-0.0609497	0.650738	0.956937
BRCA2_BRCA2	0.0537284	0.0771622	-0.0234338	0.650826	0.956937
PTEN_PTEN	0.0586351	0.012847	0.0457881	0.651478	0.956937
GSK3A_GSK3B_GSK3_alpha_beta_pS21	-0.00448457	0.0670727	-0.0715572	0.658156	0.956937
MAP2K1_MEK1	0.077124	0.14716	-0.0700361	0.658239	0.956937
BID_Bid	0.0641394	0.0317281	0.0324113	0.659936	0.956937
XPB1_XPB1	0.0881304	-0.00812891	0.0962593	0.664807	0.956937
SERPINE1_PAI_1	-0.0444893	0.00566239	-0.0501516	0.671465	0.956937
TSC2_Tuberin_pT1462	0.0285316	0.0780079	-0.0494763	0.67687	0.956937
EIF4EBP1_4E_BP1_pT37_T46	0.208512	0.115552	0.0929607	0.68075	0.956937
BECN1_Beclin	-0.0629524	-0.0470704	-0.015882	0.688508	0.956937
ANXA7_Annexin_VII	0.0673009	0.05166	0.0156409	0.69279	0.956937
COL6A1_Collagen_VI	0.0979235	0.0704948	0.0274287	0.695293	0.956937
RPS6KA1_p90RSK	-0.007207	-0.0299637	0.0227567	0.703754	0.956937
SMAD3_Smad3	0.0324912	0.0555451	-0.0230539	0.70432	0.956937
KIT_c_Kit	-0.0440699	-0.127595	0.0835252	0.710133	0.956937
BAK1_Bak	-0.00110291	-0.010515	0.00941208	0.725847	0.956937
CLDN7_Claudin_7	-0.0440971	-0.0319458	-0.0121512	0.735977	0.956937
SCD1_SCD1	-0.0409147	-0.0268621	-0.0140527	0.742488	0.956937
PDCD4_PDCD4	0.133197	0.0762514	0.056946	0.743164	0.956937
XRCC1_XRCC1	0.0401177	0.0274733	0.0126444	0.749687	0.956937
BAX_Bax	0.0708105	0.0450463	0.0257642	0.750338	0.956937
DIRAS3_Di_Ras3	-0.0542892	-0.0678218	0.0135326	0.750845	0.956937
GAB2_Gab20	-0.034233	-0.0613838	0.0271508	0.753642	0.956937
ASNS_ASNS	-0.032052	-0.0130673	-0.0189847	0.75441	0.956937
BRAF_B_Raf	-0.0619912	0.00847973	-0.070471	0.767846	0.960301
MS4A1_CD20	-0.0152839	-0.00520667	-0.0100772	0.768634	0.960301
EIF4EBP1_4E_BP1_pT70	0.0160015	-0.00130231	0.0173038	0.772306	0.960301
AKT1_AKT2_AKT3_Akt_pT308	0.0979646	0.0587794	0.0391852	0.784895	0.969576
YAP1_YAP_pS127	0.103437	0.0740063	0.0294305	0.795881	0.97103
WWTR1_TAZ	0.0212924	0.034307	-0.0130145	0.796347	0.97103
CHEK2_Chk2_pT68	-0.0244828	-0.0151399	-0.00934292	0.80523	0.975167
STAT5A_STAT5_alpha	-0.0152871	0.00567755	-0.0209646	0.810059	0.975167
RPS6KA1_p90RSK_pT359_S363	0.00720858	0.0192805	-0.012072	0.823809	0.984487
RPS6_S6	0.0303025	0.016022	0.0142805	0.830979	0.984487
STMN1_Stathmin	1.03929e-05	-0.0106226	0.010633	0.84035	0.984487
CDK1_CDK1	0.157419	0.190846	-0.0334276	0.846974	0.984487
RB1_Rb_pS807_S811	-0.0684887	-0.0314474	-0.0370413	0.853017	0.984487
YAP1_YAP	0.0191499	0.0116076	0.00754223	0.853764	0.984487
EIF4EBP1_4E_BP1_pS65	0.0420821	0.0542426	-0.0121605	0.854798	0.984487
PRKCB_PKC_pan_BetaII_pS660	-0.0532879	-0.0193219	-0.033966	0.86132	0.984487
ERBB3_HER3	0.0533224	0.0432477	0.0100746	0.865343	0.984487
JUN_c_Jun_pS73	0.0115773	0.00103284	0.0105445	0.877797	0.984487
LCK_Lck	0.00327664	-0.00782191	0.0110986	0.880456	0.984487
AKT1S1_PRAS40_pT246	0.094673	0.080324	0.014349	0.882434	0.984487
FN1_Fibronectin	0.0226622	0.0377683	-0.0151061	0.88716	0.984487
PDK1_PDK1_pS241	-0.0311231	-0.0452828	0.0141597	0.8972	0.984487
SRC_Src_pY416	0.0404993	0.0250112	0.0154881	0.903259	0.984487
BCL2L1_Bcl_xL	0.0313608	0.0401104	-0.00874961	0.906457	0.984487
PRKAA1_AMPK_pT172	-0.108039	-0.11877	0.0107312	0.91743	0.984487
RPS6KB1_p70S6K	-0.0185867	-0.0244471	0.00586044	0.920419	0.984487
MAP2K1_MEK1_pS217_S221	0.0675872	0.0742631	-0.00667582	0.92353	0.984487
STK11_LKB1	-0.0266066	-0.0321348	0.00552824	0.932412	0.984487
CCNB1_Cyclin_B1	0.113882	0.121581	-0.00769845	0.934852	0.984487
MAPK9_JNK2	0.0148638	0.0206181	-0.00575435	0.93833	0.984487
YBX1_YB_1_pS102	0.0634064	0.0663253	-0.00291888	0.943253	0.984487
TIGAR_TIGAR	0.155345	0.166422	-0.0110771	0.947404	0.984487
AKT1_AKT2_AKT3_Akt_pS473	0.0285331	0.0161236	0.0124095	0.950068	0.984487
CCND1_Cyclin_D1	-0.255684	-0.234732	-0.020952	0.954203	0.984487
TUBA1B_Acetyl_a_Tubulin_Lys40	0.0569414	0.0683334	-0.011392	0.96504	0.984487
PRKAA1_AMPK_alpha	0.0164624	0.0188336	-0.00237124	0.966474	0.984487
ACVRL1_ACVRL1	0.000560248	0.00215984	-0.00159959	0.972708	0.984487
PDK1_PDK1	-0.0360423	-0.0332946	-0.00274777	0.976205	0.984487
GSK3A_GSK3B_GSK3_pS9	0.0247566	0.0288348	-0.00407824	0.979278	0.984487
RPS6_S6_pS235_S236	0.0293755	0.0311601	-0.00178453	0.987895	0.987895
