# Supplementary material for: T2–FLAIR Mismatch, an Imaging Biomarker for IDH and 1p/19q Status in Lower-grade Gliomas: A TCGA/TCIA Project
Source: Oxford University Press journal article supplement (doi:10.1158/1078-0432.ccr-17-0560), 2017-07-27
Supplement: 10780432ccr170560-sup-179542_3_supp_4148237_lslqlf.xlsx [file 10780432ccr170560-sup-179542_3_supp_4148237_lslqlf.xlsx]

## Sheet: proteinmismatchall (3)
Protein ID	Mismatch	No Mismatch	Mean difference	P-value	Adj P-value
MTOR_mTOR	0.20635	-0.0266543	0.233004	2.12501e-05	0.00401627
ERBB2_HER2	-0.120205	0.109991	-0.230196	7.66597e-05	0.00724435
G6PD_G6PD	-0.0750916	0.0200274	-0.095119	0.00211866	0.129567
PEA15_PEA15	0.31988	-0.055517	0.375397	0.00274216	0.129567
PARK7_DJ_1	0.173426	0.016049	0.157377	0.00442424	0.167236
SYK_Syk	0.392777	-0.000880965	0.393658	0.00576275	0.181527
VHL_VHL	-0.153915	0.028459	-0.182374	0.00951455	0.224781
SQSTM1_p62_LCK_ligand	-0.132091	0.0165981	-0.148689	0.00905152	0.224781
ANXA1_Annexin_1	-0.137949	0.31016	-0.448109	0.0125379	0.236967
TFRC_TFRC	-0.195775	0.230684	-0.426459	0.0112926	0.236967
ANXA7_Annexin_VII	0.0673009	-0.0186192	0.0859202	0.0249909	0.347238
ERBB2_HER2_pY1248	-0.0112247	0.173847	-0.185072	0.0267211	0.347238
PIK3CA__PI3K_p110_alpha	0.0210192	-0.0742686	0.0952877	0.0254352	0.347238
RPTOR_Raptor	0.130143	-0.0179573	0.1481	0.0234928	0.347238
SRSF1_SF2	0.205433	-0.0127051	0.218138	0.0275586	0.347238
RICTOR_Rictor	0.119076	-0.0088701	0.127946	0.0301099	0.355673
IGFBP2_IGFBP2	-0.190529	0.117891	-0.30842	0.0323601	0.359768
MYH9_Myosin_IIa_pS1943	-0.224785	0.172719	-0.397505	0.0396234	0.394149
SRC_Src	0.202667	0.0124376	0.190229	0.0390981	0.394149
DVL3_Dvl3	0.111706	0.0023497	0.109357	0.0496358	0.469058
MET_c_Met_pY1235	0.0571497	-0.0118717	0.0690215	0.0553887	0.498498
ITGA2_CD49b	0.307272	0.0530069	0.254266	0.0637677	0.524004
PRKCA__PKC_alpha_pS657	0.187553	-0.0797235	0.267276	0.0614275	0.524004
PECAM1_CD31	-0.0665379	0.0227147	-0.0892525	0.0696868	0.548784
IRS1_IRS1	-0.0657982	0.0122244	-0.0780226	0.0863152	0.627445
PCNA_PCNA	-0.0635961	-0.0194325	-0.0441636	0.0861656	0.627445
FOXM1_FoxM1	-0.0154617	0.069762	-0.0852237	0.0944084	0.660858
ACACA_ACC1	0.139225	-0.0337462	0.172971	0.103605	0.699332
ARAF_A_Raf_pS299	-0.0425997	0.0209952	-0.0635949	0.121034	0.780067
BECN1_Beclin	-0.0629524	-0.00420996	-0.0587424	0.132075	0.780067
STAT3_STAT3_pY705	0.313674	0.000970083	0.312704	0.131408	0.780067
CTNNA1_alpha_Catenin	0.109232	-0.0739905	0.183223	0.126247	0.780067
CDH1_E_Cadherin	0.382439	0.0973013	0.285138	0.159814	0.784446
EGFR_EGFR_pY1068	0.0677099	0.233341	-0.165631	0.176398	0.784446
GAPDH_GAPDH	-0.0854166	0.0788822	-0.164299	0.153297	0.784446
MAPK1_MAPK3_MAPK_pT202_Y204	0.255969	-0.194971	0.450941	0.175797	0.784446
ERRFI1_MIG_6	-0.077608	-0.0183085	-0.0592995	0.170453	0.784446
SERPINE1_PAI_1	-0.0444893	0.137183	-0.181672	0.150808	0.784446
PRKCA__PKC_alpha	0.127124	-0.066945	0.194069	0.160074	0.784446
RICTOR_Rictor_pT1135	0.0974639	0.0130668	0.0843971	0.175904	0.784446
SRC_Src_pY527	0.233075	-0.00186267	0.234938	0.177904	0.784446
TTF1_TTF1	-0.0572403	0.0518411	-0.109081	0.13711	0.784446
MYC_c_Myc	-0.086034	0.144322	-0.230356	0.182622	0.784446
MTOR_mTOR_pS2448	0.136802	0.0367575	0.100045	0.182533	0.784446
ASNS_ASNS	-0.032052	0.0353293	-0.0673812	0.192434	0.796419
BCL2_Bcl_2	-0.00627898	0.0952361	-0.101515	0.249897	0.796419
BCL2L11_Bim	0.148808	0.0433353	0.105473	0.215455	0.796419
CLDN7_Claudin_7	-0.0440971	-0.00440308	-0.039694	0.254248	0.796419
EGFR_EGFR	0.155016	0.294092	-0.139076	0.242914	0.796419
EGFR_EGFR_pY1173	0.00374263	0.0657537	-0.062011	0.214212	0.796419
FOXO3_FOXO3a_pS318_S321	-0.0706135	-0.013889	-0.0567245	0.250414	0.796419
INPP4B_INPP4B	-0.0573335	0.0549503	-0.112284	0.226979	0.796419
XRCC5_Ku80	0.108324	-0.026544	0.134868	0.244428	0.796419
NDRG1_NDRG1_pT346	-0.152633	-0.0168883	-0.135745	0.238055	0.796419
PDCD4_PDCD4	0.133197	-0.0658269	0.199024	0.242829	0.796419
RAB11A_RAB11B_Rab11	0.0134936	0.0651662	-0.0516726	0.261259	0.796419
RAB25_Rab25	-0.0591173	-0.00199869	-0.0571186	0.245012	0.796419
SMAD1_Smad1	0.159908	0.075023	0.084885	0.26036	0.796419
TGM2_Transglutaminase	-0.0341076	0.00512845	-0.0392361	0.195556	0.796419
CTNNB1_beta_Catenin	0.152067	-0.0136563	0.165723	0.203921	0.796419
BIRC2__cIAP	0.0231788	-0.0348995	0.0580783	0.22744	0.796419
CDKN1B_p27_pT198	-0.0171374	0.0200577	-0.037195	0.250782	0.796419
MAPK14_p38_MAPK	0.179585	0.0549489	0.124637	0.27203	0.816091
YWHAB_14_3_3_beta	-0.032652	0.0324674	-0.0651195	0.312647	0.818716
AR_AR	0.104793	0.0323788	0.0724138	0.300808	0.818716
CASP7_Caspase_7_cleavedD198	-0.00288379	0.0407604	-0.0436442	0.299974	0.818716
CCNE1_Cyclin_E1	0.11042	0.0455492	0.0648708	0.305103	0.818716
ETS1_ETS_1	0.020187	0.142345	-0.122158	0.295671	0.818716
FOXO3_FOXO3a	0.130176	0.0444621	0.0857136	0.300528	0.818716
WWTR1_TAZ	0.0212924	0.0726972	-0.0514048	0.311697	0.818716
EEF2K_eEF2K	0.0810533	-0.00661022	0.0876635	0.28306	0.818716
CDKN1A_p21	0.0447769	-0.0417146	0.0864915	0.316224	0.818716
CDKN1B_p27_pT157	-0.0413197	-0.0136738	-0.0276459	0.289614	0.818716
EEF2_eEF2	0.010193	0.085369	-0.075176	0.322385	0.82339
NRG1_Heregulin	-0.0858155	-0.0395231	-0.0462925	0.335262	0.834251
NF2_NF2	0.13329	0.0443588	0.0889313	0.335466	0.834251
NFKB1_NF_kB_p65_pS536	-0.0495744	0.0678942	-0.117469	0.340364	0.83544
RAF1_C_Raf	0.0536635	0.00615783	0.0475057	0.367575	0.851596
MAPK1_ERK2	0.212662	0.105494	0.107168	0.373981	0.851596
GATA3_GATA3	-0.0159725	0.0408747	-0.0568472	0.360158	0.851596
CDH3_P_Cadherin	0.00747218	0.0496373	-0.0421651	0.372787	0.851596
RBM15_RBM15	0.121104	0.00841125	0.112693	0.358529	0.851596
CDKN1B_p27	0.159904	0.064557	0.0953472	0.368996	0.851596
FN1_Fibronectin	0.0226622	0.1166	-0.0939381	0.387364	0.871569
TSC1_TSC1	0.0892334	-0.0144791	0.103713	0.396477	0.881578
RAF1_C_Raf_pS338	0.0146691	0.0473925	-0.0327234	0.42407	0.88621
CAV1_Caveolin_1	0.076798	0.281848	-0.20505	0.424881	0.88621
MYH11_MYH11	0.0383305	0.137263	-0.0989326	0.426694	0.88621
PIK3R1_PIK3R2_PI3K_p85	0.0576752	0.00330582	0.0543693	0.421402	0.88621
YAP1_YAP_pS127	0.103437	0.0113469	0.0920899	0.406785	0.88621
YBX1_YB_1_pS102	0.0634064	0.0320707	0.0313357	0.40936	0.88621
ESR1_ER_alpha_pS118	0.0129616	-0.0125026	0.0254642	0.436187	0.89608
YWHAE_14_3_3_epsilon	0.0278548	0.0626213	-0.0347665	0.520468	0.898092
YWHAZ_14_3_3_zeta	0.000405318	0.0756855	-0.0752801	0.467283	0.898092
EIF4EBP1_4E_BP1	0.0678914	0.0260657	0.0418256	0.624088	0.898092
EIF4EBP1_4E_BP1_pS65	0.0420821	0.0759529	-0.0338708	0.568291	0.898092
EIF4EBP1_4E_BP1_pT37_T46	0.208512	0.083494	0.125018	0.566261	0.898092
ATM_ATM	0.0777212	0.0147944	0.0629268	0.582809	0.898092
AKT1_AKT2_AKT3_Akt_pT308	0.0979646	0.00618128	0.0917833	0.517081	0.898092
BRAF_B_Raf	-0.0619912	0.0981807	-0.160172	0.483677	0.898092
BAD_Bad_pS112	0.0486295	0.0185793	0.0300502	0.530416	0.898092
MS4A1_CD20	-0.0152839	0.00622946	-0.0215134	0.537823	0.898092
CHEK1_Chk1_pS345	-0.0336659	-0.006984	-0.0266819	0.60616	0.898092
CHEK2_Chk2	0.0212843	0.0513983	-0.030114	0.61024	0.898092
CCND1_Cyclin_D1	-0.255684	0.0117098	-0.267393	0.452684	0.898092
ESR1_ER_alpha	-0.000231828	0.0268935	-0.0271254	0.602735	0.898092
FASN_FASN	0.0477482	-0.0114172	0.0591654	0.464372	0.898092
GSK3A_GSK3B_GSK3_alpha_beta	-0.080652	0.0100361	-0.0906881	0.45807	0.898092
GAB2_Gab20	-0.034233	-0.078083	0.0438499	0.562012	0.898092
ERBB3_HER3	0.0533224	0.0843729	-0.0310505	0.607841	0.898092
MAPK8_JNK_pT183_pY185	0.00632872	0.0552053	-0.0488766	0.617796	0.898092
STK11_LKB1	-0.0266066	0.0139942	-0.0406008	0.513799	0.898092
MAP2K1_MEK1_pS217_S221	0.0675872	0.0279474	0.0396398	0.554418	0.898092
MRE11A_Mre11	-0.0104836	0.00815332	-0.0186369	0.585458	0.898092
NRAS_N_Ras	-0.0342802	-0.0150433	-0.0192369	0.627239	0.898092
NOTCH1_Notch1	-0.0116412	0.0166587	-0.0282999	0.586815	0.898092
PDK1_PDK1	-0.0360423	0.00783736	-0.0438797	0.619831	0.898092
PGR_PR	-0.00996341	0.00936011	-0.0193235	0.514814	0.898092
AKT1S1_PRAS40_pT246	0.094673	0.0390916	0.0555814	0.54941	0.898092
PREX1_PREX1	0.0578315	-0.0105238	0.0683553	0.595754	0.898092
PXN_Paxillin	-0.0162984	0.0246069	-0.0409053	0.619843	0.898092
RPS6_S6	0.0303025	-0.00470715	0.0350096	0.591223	0.898092
RPS6_S6_pS235_S236	0.0293755	-0.0270824	0.056458	0.620314	0.898092
RPS6_S6_pS240_S244	-0.0666859	-0.0131885	-0.0534974	0.501904	0.898092
STAT5A_STAT5_alpha	-0.0152871	0.0270036	-0.0422907	0.615342	0.898092
SHC1_Shc_pY317	-0.0471171	-0.0198077	-0.0273094	0.619406	0.898092
SMAD3_Smad3	0.0324912	0.0699657	-0.0374745	0.499199	0.898092
SMAD4_Smad4	0.0432217	0.0201409	0.0230808	0.516996	0.898092
TIGAR_TIGAR	0.155345	0.0648655	0.0904793	0.577348	0.898092
YBX1_YB_1	-0.0218835	0.0189715	-0.040855	0.52609	0.898092
EIF4E_eIF4E	0.026862	-0.00528206	0.032144	0.459971	0.898092
MAPK14_p38_pT180_Y182	0.101079	0.00464218	0.0964373	0.502199	0.898092
AKT1_AKT2_AKT3_Akt_pS473	0.0285331	-0.0638954	0.0924285	0.63265	0.899029
PRKAA1_AMPK_pT172	-0.108039	-0.06332	-0.0447189	0.643281	0.907314
PRKAA1_AMPK_alpha	0.0164624	0.0383077	-0.0218453	0.664889	0.911068
BAX_Bax	0.0708105	0.105485	-0.0346743	0.671745	0.911068
CHEK1_Chk1	-0.0214648	-0.00607601	-0.0153888	0.662661	0.911068
CCNE2_Cyclin_E2	-0.0312419	-0.0156561	-0.0155857	0.656081	0.911068
HSPA1A_HSP70	0.175397	0.296309	-0.120912	0.674865	0.911068
PRDX1_PRDX1	-0.0182567	0.0116875	-0.0299443	0.669472	0.911068
ACVRL1_ACVRL1	0.000560248	0.0182831	-0.0177229	0.683193	0.912604
CDK1_CDK1	0.157419	0.0929248	0.064494	0.700905	0.912604
DIRAS3_Di_Ras3	-0.0542892	-0.0696478	0.0153585	0.704974	0.912604
PTEN_PTEN	0.0586351	0.0204881	0.0381471	0.693602	0.912604
SCD1_SCD1	-0.0409147	-0.0263743	-0.0145404	0.700294	0.912604
RPS6KA1_p90RSK_pT359_S363	0.00720858	0.0267936	-0.019585	0.700595	0.912604
KIT_c_Kit	-0.0440699	0.0344876	-0.0785576	0.713793	0.917733
TP53BP1_53BP1	0.108529	0.0716165	0.036913	0.768521	0.919107
GSK3A_GSK3B_GSK3_alpha_beta_pS21	-0.00448457	-0.0486994	0.0442148	0.780341	0.919107
LCK_Lck	0.00327664	0.0218795	-0.0186029	0.785024	0.919107
MAP2K1_MEK1	0.077124	0.117083	-0.0399592	0.787806	0.919107
CDH2_N_Cadherin	0.094162	0.0745929	0.0195691	0.785501	0.919107
PDK1_PDK1_pS241	-0.0311231	0.00321186	-0.034335	0.74449	0.919107
PRKCD_PKC_delta_pS664	0.061672	0.00867635	0.0529957	0.72777	0.919107
PRKCB_PKC_pan_BetaII_pS660	-0.0532879	-0.113343	0.0600549	0.755334	0.919107
RB1_Rb_pS807_S811	-0.0684887	-0.0141816	-0.0543071	0.773509	0.919107
SRC_Src_pY416	0.0404993	0.0792723	-0.0387729	0.755326	0.919107
STMN1_Stathmin	1.03929e-05	-0.0165745	0.0165849	0.755288	0.919107
TSC2_Tuberin	-0.0610526	-0.0997406	0.038688	0.751193	0.919107
KDR_VEGFR2	0.0238987	-0.000352999	0.0242517	0.78372	0.919107
XPB1_XPB1	0.0881304	0.0290164	0.0591141	0.780825	0.919107
XRCC1_XRCC1	0.0401177	0.0299665	0.0101512	0.784459	0.919107
BID_Bid	0.0641394	0.0471863	0.0169531	0.814906	0.934638
EIF4G1_eIF4G	0.00967506	-0.00600281	0.0156779	0.814907	0.934638
RPS6KB1_p70S6K	-0.0185867	-0.0318342	0.0132475	0.815954	0.934638
BCL2L1_Bcl_xL	0.0313608	0.0477882	-0.0164274	0.821475	0.935294
EIF4EBP1_4E_BP1_pT70	0.0160015	0.00428095	0.0117206	0.835135	0.936447
TUBA1B_Acetyl_a_Tubulin_Lys40	0.0569414	0.00360823	0.0533332	0.831067	0.936447
GSK3A_GSK3B_GSK3_pS9	0.0247566	-0.0047445	0.0295011	0.844603	0.936447
PEA15_PEA15_pS116	0.152338	0.178596	-0.026258	0.847261	0.936447
YAP1_YAP	0.0191499	0.0272995	-0.00814959	0.842724	0.936447
ADAR_ADAR1	0.0157343	0.0247683	-0.00903409	0.862443	0.947684
AKT1_AKT2_AKT3_Akt	0.0364779	0.020203	0.0162749	0.87906	0.950872
BRCA2_BRCA2	0.0537284	0.0600689	-0.00634052	0.899281	0.950872
BAK1_Bak	-0.00110291	0.002107	-0.00320991	0.893599	0.950872
COL6A1_Collagen_VI	0.0979235	0.10735	-0.00942687	0.891083	0.950872
RAD50_Rad50	0.0845874	0.0730314	0.011556	0.900561	0.950872
TSC2_Tuberin_pT1462	0.0285316	0.012639	0.0158926	0.888629	0.950872
JUN_c_Jun_pS73	0.0115773	0.021261	-0.00968374	0.882191	0.950872
ERBB3_HER3_pY1289	0.0707349	0.0797699	-0.00903495	0.918456	0.964379
CHEK2_Chk2_pT68	-0.0244828	-0.0212504	-0.00323244	0.930594	0.967158
CCNB1_Cyclin_B1	0.113882	0.120442	-0.00655943	0.935973	0.967158
RPS6KB1_p70S6K_pT389	0.0379938	0.017221	0.0207728	0.936454	0.967158
MAPK9_JNK2	0.0148638	0.0108522	0.0040116	0.952875	0.978769
ACACA_ACACB_ACC_pS79	-0.0066714	-0.0107821	0.00411072	0.968619	0.984242
RPS6KA1_p90RSK	-0.007207	-0.00510931	-0.0020977	0.968076	0.984242
BAP1_Bap1_c_4	-0.00581973	-0.00686069	0.00104097	0.984455	0.987707
RAD51_Rad51	0.0295675	0.0275644	0.00200309	0.987707	0.987707
TP53_p53	0.0307168	0.0319418	-0.00122499	0.984087	0.987707
