# Supplementary material for: T2–FLAIR Mismatch, an Imaging Biomarker for IDH and 1p/19q Status in Lower-grade Gliomas: A TCGA/TCIA Project
Source: Oxford University Press journal article supplement (doi:10.1158/1078-0432.ccr-17-0560), 2017-07-27
Supplement: 10780432ccr170560-sup-179542_3_supp_4148239_5s5q5f.xlsx [file 10780432ccr170560-sup-179542_3_supp_4148239_5s5q5f.xlsx]

## Sheet: gsea_report_for_Mismatch_147675
NAME	SIZE	ES	NES	NOM p-value	FDR q-value	FWER p-val	RANK AT MAX	LEADING EDGE
PID_HDAC_CLASSII_PATHWAY	34	-0.357627	-1.31877	0.12093	1	0.923	3017	tags=26%, list=15%, signal=31%
PID_BARD1_PATHWAY	29	-0.525926	-1.31609	0.228216	1	0.925	3412	tags=38%, list=17%, signal=45%
PID_ERB_GENOMIC_PATHWAY	15	-0.451459	-1.30526	0.160944	1	0.929	3312	tags=40%, list=16%, signal=48%
PID_HEDGEHOG_2PATHWAY	22	-0.386922	-1.25686	0.17734	1	0.953	4311	tags=41%, list=21%, signal=52%
PID_PI3KCI_AKT_PATHWAY	35	-0.376146	-1.24442	0.195506	1	0.959	2451	tags=31%, list=12%, signal=36%
PID_BETA_CATENIN_DEG_PATHWAY	18	-0.412814	-1.21221	0.233607	1	0.974	4261	tags=39%, list=21%, signal=49%
PID_FANCONI_PATHWAY	46	-0.478225	-1.19957	0.313646	1	0.977	4076	tags=43%, list=20%, signal=54%
PID_HES_HEY_PATHWAY	48	-0.380439	-1.16871	0.29011	1	0.986	3494	tags=35%, list=17%, signal=43%
PID_PS1_PATHWAY	46	-0.307709	-1.14734	0.230263	1	0.988	2557	tags=22%, list=12%, signal=25%
PID_AR_NONGENOMIC_PATHWAY	31	-0.31779	-1.14542	0.251656	1	0.988	4311	tags=35%, list=21%, signal=45%
PID_HEDGEHOG_GLI_PATHWAY	48	-0.303404	-1.13407	0.271715	1	0.99	3763	tags=29%, list=18%, signal=36%
PID_ECADHERIN_KERATINOCYTE_PATHWAY	21	-0.404269	-1.1259	0.294505	0.973844	0.991	4715	tags=43%, list=23%, signal=56%
PID_HNF3A_PATHWAY	44	-0.309432	-1.11133	0.25974	0.946414	0.991	3312	tags=25%, list=16%, signal=30%
PID_MTOR_4PATHWAY	67	-0.26149	-1.08271	0.3	0.971438	0.992	5261	tags=39%, list=26%, signal=52%
PID_CONE_PATHWAY	23	-0.343758	-1.06947	0.368421	0.948595	0.993	6739	tags=61%, list=33%, signal=91%
PID_NETRIN_PATHWAY	32	-0.320212	-1.04447	0.383408	0.970531	0.996	3049	tags=28%, list=15%, signal=33%
PID_BMP_PATHWAY	42	-0.313418	-1.04371	0.4	0.916433	0.996	3588	tags=31%, list=18%, signal=37%
PID_AR_TF_PATHWAY	52	-0.287262	-0.972769	0.494331	1	0.999	4982	tags=35%, list=24%, signal=46%
PID_FOXO_PATHWAY	49	-0.260098	-0.966289	0.49005	1	0.999	2239	tags=18%, list=11%, signal=21%
PID_NFKAPPAB_ATYPICAL_PATHWAY	17	-0.368117	-0.949568	0.503226	1	0.999	2073	tags=29%, list=10%, signal=33%
PID_HDAC_CLASSI_PATHWAY	66	-0.248754	-0.946672	0.536842	1	0.999	2530	tags=20%, list=12%, signal=22%
PID_HDAC_CLASSIII_PATHWAY	25	-0.279258	-0.913285	0.590308	1	1	2740	tags=24%, list=13%, signal=28%
PID_BETA_CATENIN_NUC_PATHWAY	79	-0.217707	-0.909726	0.614251	1	1	4634	tags=30%, list=23%, signal=39%
PID_RB_1PATHWAY	65	-0.254655	-0.905012	0.569794	0.992149	1	3461	tags=22%, list=17%, signal=26%
PID_WNT_NONCANONICAL_PATHWAY	32	-0.267472	-0.901482	0.580723	0.96234	1	5324	tags=44%, list=26%, signal=59%
PID_LKB1_PATHWAY	47	-0.238987	-0.878826	0.62556	0.986495	1	4900	tags=32%, list=24%, signal=42%
PID_ATM_PATHWAY	34	-0.324683	-0.865439	0.618947	0.985405	1	4813	tags=32%, list=23%, signal=42%
PID_ERA_GENOMIC_PATHWAY	64	-0.215194	-0.864672	0.748148	0.952	1	4000	tags=23%, list=20%, signal=29%
PID_TELOMERASE_PATHWAY	68	-0.24399	-0.849901	0.652268	0.955098	1	4311	tags=31%, list=21%, signal=39%
PID_NFKAPPAB_CANONICAL_PATHWAY	23	-0.317	-0.847162	0.656455	0.930077	1	2146	tags=22%, list=10%, signal=24%
PID_RHODOPSIN_PATHWAY	24	-0.281871	-0.843713	0.693396	0.908622	1	5543	tags=42%, list=27%, signal=57%
PID_SMAD2_3NUCLEAR_PATHWAY	81	-0.228177	-0.812458	0.721198	0.947848	1	3588	tags=25%, list=18%, signal=30%
PID_ATR_PATHWAY	39	-0.30919	-0.80133	0.665245	0.940983	1	5076	tags=36%, list=25%, signal=48%
PID_ER_NONGENOMIC_PATHWAY	41	-0.220122	-0.79229	0.806452	0.930922	1	4311	tags=29%, list=21%, signal=37%
PID_IGF1_PATHWAY	30	-0.218839	-0.742491	0.816777	1	1	4515	tags=30%, list=22%, signal=38%
PID_IL1_PATHWAY	34	-0.230551	-0.726197	0.799523	1	1	1625	tags=15%, list=8%, signal=16%
PID_DNA_PK_PATHWAY	16	-0.256458	-0.69557	0.80625	1	1	2465	tags=25%, list=12%, signal=28%
PID_CIRCADIAN_PATHWAY	16	-0.229799	-0.666485	0.887641	1	1	4165	tags=31%, list=20%, signal=39%
PID_TOLL_ENDOGENOUS_PATHWAY	25	-0.25531	-0.654877	0.817787	1	1	5201	tags=40%, list=25%, signal=54%
PID_PI3KCI_PATHWAY	49	-0.197723	-0.638914	0.884977	1	1	3167	tags=18%, list=15%, signal=22%
PID_P53_REGULATION_PATHWAY	58	-0.167185	-0.588453	0.948827	1	1	4457	tags=28%, list=22%, signal=35%
PID_AURORA_A_PATHWAY	31	-0.198297	-0.582325	0.931718	1	1	4471	tags=23%, list=22%, signal=29%
PID_NEPHRIN_NEPH1_PATHWAY	31	-0.168938	-0.564994	0.978308	1	1	2526	tags=13%, list=12%, signal=15%
PID_LIS1_PATHWAY	28	-0.164195	-0.514071	0.986813	1	1	3047	tags=18%, list=15%, signal=21%
PID_PLK1_PATHWAY	45	-0.195756	-0.504129	0.86875	0.981223	1	6954	tags=40%, list=34%, signal=60%
