# Supplementary material for: T2–FLAIR Mismatch, an Imaging Biomarker for IDH and 1p/19q Status in Lower-grade Gliomas: A TCGA/TCIA Project
Source: Oxford University Press journal article supplement (doi:10.1158/1078-0432.ccr-17-0560), 2017-07-27
Supplement: 10780432ccr170560-sup-179542_3_supp_4148243_hshqhf.xlsx [file 10780432ccr170560-sup-179542_3_supp_4148243_hshqhf.xlsx]

## Sheet: GSEA all cases
NAME	SIZE	ES	NES	NOM p-value	FDR q-val	FWER p-value	RANK AT MAX	LEADING EDGE
PID_AR_NONGENOMIC_PATHWAY	31	-0.483107	-1.71407	0.0138889	0.902972	0.352	4986	tags=58%, list=24%, signal=77%
PID_MTOR_4PATHWAY	67	-0.368424	-1.51256	0.0119617	1	0.695	3872	tags=40%, list=19%, signal=50%
PID_WNT_NONCANONICAL_PATHWAY	32	-0.43589	-1.42954	0.0756881	1	0.788	4187	tags=47%, list=20%, signal=59%
PID_BETA_CATENIN_DEG_PATHWAY	18	-0.465194	-1.38387	0.122056	1	0.837	4187	tags=50%, list=20%, signal=63%
PID_NFKAPPAB_ATYPICAL_PATHWAY	17	-0.519185	-1.3356	0.16269	1	0.873	3020	tags=41%, list=15%, signal=48%
PID_ERB_GENOMIC_PATHWAY	15	-0.454273	-1.32819	0.144958	1	0.879	4647	tags=40%, list=23%, signal=52%
PID_HEDGEHOG_GLI_PATHWAY	48	-0.36088	-1.29888	0.138085	1	0.903	4131	tags=42%, list=20%, signal=52%
PID_PI3KCI_PATHWAY	49	-0.398642	-1.2982	0.198044	1	0.903	4368	tags=49%, list=21%, signal=62%
PID_MET_PATHWAY	79	-0.334973	-1.28654	0.132883	1	0.916	4986	tags=47%, list=24%, signal=62%
PID_NFKAPPAB_CANONICAL_PATHWAY	23	-0.472681	-1.28643	0.216769	1	0.917	3237	tags=35%, list=16%, signal=41%
PID_ERA_GENOMIC_PATHWAY	64	-0.322114	-1.27982	0.120283	1	0.921	4715	tags=34%, list=23%, signal=45%
PID_PI3KCI_AKT_PATHWAY	35	-0.386776	-1.26115	0.171694	1	0.932	3927	tags=43%, list=19%, signal=53%
PID_CXCR3_PATHWAY	43	-0.345757	-1.22844	0.171053	1	0.951	2450	tags=30%, list=12%, signal=34%
PID_NETRIN_PATHWAY	32	-0.372481	-1.2271	0.197309	1	0.953	2476	tags=28%, list=12%, signal=32%
PID_HES_HEY_PATHWAY	48	-0.375883	-1.21529	0.237778	1	0.959	4915	tags=46%, list=24%, signal=60%
PID_PS1_PATHWAY	46	-0.328351	-1.2152	0.165865	1	0.959	3578	tags=33%, list=17%, signal=39%
PID_THROMBIN_PAR1_PATHWAY	43	-0.346901	-1.20335	0.205742	1	0.964	2393	tags=30%, list=12%, signal=34%
PID_HNF3A_PATHWAY	44	-0.31981	-1.20141	0.223433	1	0.964	1979	tags=18%, list=10%, signal=20%
PID_LYSOPHOSPHOLIPID_PATHWAY	66	-0.311429	-1.19935	0.198966	0.994045	0.964	3070	tags=32%, list=15%, signal=37%
PID_GMCSF_PATHWAY	37	-0.387286	-1.17558	0.289238	1	0.979	2643	tags=30%, list=13%, signal=34%
PID_CDC42_PATHWAY	70	-0.302597	-1.17206	0.207059	0.999951	0.981	2793	tags=27%, list=14%, signal=31%
PID_ER_NONGENOMIC_PATHWAY	41	-0.330646	-1.17123	0.25058	0.957104	0.981	2476	tags=32%, list=12%, signal=36%
PID_EPO_PATHWAY	34	-0.406031	-1.1406	0.339744	1	0.99	4848	tags=59%, list=24%, signal=77%
PID_BETA_CATENIN_NUC_PATHWAY	79	-0.279982	-1.12801	0.242574	1	0.991	1674	tags=20%, list=8%, signal=22%
PID_S1P_META_PATHWAY	21	-0.364268	-1.12457	0.319149	1	0.991	3070	tags=38%, list=15%, signal=45%
PID_THROMBIN_PAR4_PATHWAY	15	-0.412639	-1.11978	0.336303	0.984139	0.992	2236	tags=40%, list=11%, signal=45%
PID_ERBB1_INTERNALIZATION_PATHWAY	40	-0.323064	-1.1178	0.274123	0.954342	0.993	2301	tags=28%, list=11%, signal=31%
PID_BMP_PATHWAY	42	-0.32271	-1.11452	0.302752	0.931242	0.993	2235	tags=29%, list=11%, signal=32%
PID_BCR_5PATHWAY	65	-0.342716	-1.10537	0.362385	0.930018	0.993	4986	tags=46%, list=24%, signal=61%
PID_TOLL_ENDOGENOUS_PATHWAY	25	-0.427408	-1.09502	0.38512	0.930674	0.995	2008	tags=36%, list=10%, signal=40%
PID_AMB2_NEUTROPHILS_PATHWAY	41	-0.357636	-1.09492	0.359694	0.901	0.995	2914	tags=37%, list=14%, signal=43%
PID_CONE_PATHWAY	23	-0.327013	-1.06302	0.369393	0.971907	0.999	3712	tags=39%, list=18%, signal=48%
PID_RHOA_REG_PATHWAY	44	-0.289816	-1.05912	0.342723	0.955702	0.999	2344	tags=27%, list=11%, signal=31%
PID_AR_TF_PATHWAY	52	-0.293289	-1.04209	0.394009	0.979893	0.999	4570	tags=35%, list=22%, signal=44%
PID_P53_REGULATION_PATHWAY	58	-0.301069	-1.04084	0.406522	0.956054	0.999	4943	tags=38%, list=24%, signal=50%
PID_TRKR_PATHWAY	62	-0.257236	-1.04068	0.380835	0.929812	0.999	2515	tags=24%, list=12%, signal=27%
PID_IL8_CXCR2_PATHWAY	34	-0.335141	-1.03842	0.432735	0.911042	0.999	2793	tags=32%, list=14%, signal=37%
PID_CXCR4_PATHWAY	102	-0.296078	-1.03002	0.42394	0.912256	0.999	4899	tags=41%, list=24%, signal=54%
PID_ECADHERIN_KERATINOCYTE_PATHWAY	21	-0.384818	-1.02989	0.417021	0.889256	0.999	4611	tags=52%, list=22%, signal=68%
PID_ALK1_PATHWAY	26	-0.331748	-1.02604	0.417633	0.878326	0.999	2235	tags=31%, list=11%, signal=34%
PID_EPHB_FWD_PATHWAY	40	-0.291331	-1.0247	0.386256	0.860621	0.999	2772	tags=28%, list=14%, signal=32%
PID_ECADHERIN_NASCENT_AJ_PATHWAY	39	-0.304775	-1.01832	0.443038	0.859786	0.999	4191	tags=36%, list=20%, signal=45%
PID_FCER1_PATHWAY	61	-0.310407	-1.01186	0.459016	0.855975	1	5428	tags=46%, list=26%, signal=62%
PID_HDAC_CLASSI_PATHWAY	66	-0.26555	-1.00894	0.434426	0.843271	1	4545	tags=33%, list=22%, signal=43%
PID_P38_MK2_PATHWAY	21	-0.302208	-1.00522	0.468085	0.833956	1	2398	tags=33%, list=12%, signal=38%
PID_IFNG_PATHWAY	40	-0.310373	-0.999892	0.456938	0.828528	1	2793	tags=25%, list=14%, signal=29%
PID_ERBB1_RECEPTOR_PROXIMAL_PATHWAY	35	-0.307498	-0.995087	0.447191	0.823021	1	4986	tags=40%, list=24%, signal=53%
PID_P75_NTR_PATHWAY	69	-0.223395	-0.992663	0.473389	0.812484	1	2199	tags=16%, list=11%, signal=18%
PID_TGFBR_PATHWAY	55	-0.27451	-0.989298	0.478555	0.804609	1	2240	tags=22%, list=11%, signal=24%
PID_MYC_REPRESS_PATHWAY	63	-0.276005	-0.98471	0.488426	0.799368	1	2398	tags=25%, list=12%, signal=29%
PID_IGF1_PATHWAY	30	-0.293962	-0.95878	0.497738	0.848318	1	4899	tags=50%, list=24%, signal=66%
PID_NOTCH_PATHWAY	59	-0.262235	-0.951715	0.517007	0.849405	1	3411	tags=29%, list=17%, signal=34%
PID_MYC_PATHWAY	25	-0.299275	-0.950624	0.482474	0.83647	1	2228	tags=20%, list=11%, signal=22%
PID_ANTHRAX_PATHWAY	17	-0.324173	-0.945662	0.496471	0.832692	1	5207	tags=59%, list=25%, signal=79%
PID_RXR_VDR_PATHWAY	26	-0.309464	-0.941529	0.512195	0.826934	1	3509	tags=35%, list=17%, signal=42%
PID_TELOMERASE_PATHWAY	68	-0.273268	-0.93831	0.517621	0.819886	1	2019	tags=19%, list=10%, signal=21%
PID_RB_1PATHWAY	65	-0.257634	-0.935646	0.577017	0.812103	1	4884	tags=31%, list=24%, signal=40%
PID_HDAC_CLASSII_PATHWAY	34	-0.253596	-0.931677	0.581731	0.806839	1	3231	tags=24%, list=16%, signal=28%
PID_S1P_S1P3_PATHWAY	29	-0.29721	-0.931458	0.525054	0.793828	1	2236	tags=24%, list=11%, signal=27%
PID_FOXO_PATHWAY	49	-0.248104	-0.929565	0.559719	0.784319	1	5435	tags=41%, list=27%, signal=55%
PID_ENDOTHELIN_PATHWAY	63	-0.253849	-0.929159	0.534772	0.772442	1	2476	tags=22%, list=12%, signal=25%
PID_ATM_PATHWAY	34	-0.33484	-0.926318	0.537634	0.766236	1	3484	tags=29%, list=17%, signal=35%
PID_TCR_PATHWAY	66	-0.310582	-0.923798	0.545685	0.759706	1	2925	tags=29%, list=14%, signal=33%
PID_IL8_CXCR1_PATHWAY	28	-0.312939	-0.917013	0.563636	0.762142	1	2793	tags=32%, list=14%, signal=37%
PID_FAK_PATHWAY	58	-0.255806	-0.912399	0.579186	0.760294	1	4986	tags=40%, list=24%, signal=52%
PID_SMAD2_3NUCLEAR_PATHWAY	81	-0.252603	-0.912271	0.551339	0.748976	1	5177	tags=38%, list=25%, signal=51%
PID_BARD1_PATHWAY	29	-0.381776	-0.910094	0.580042	0.741929	1	6296	tags=62%, list=31%, signal=89%
PID_ALPHA_SYNUCLEIN_PATHWAY	33	-0.270093	-0.904887	0.58209	0.741873	1	2643	tags=27%, list=13%, signal=31%
PID_RHODOPSIN_PATHWAY	24	-0.291681	-0.883958	0.603175	0.775041	1	2330	tags=25%, list=11%, signal=28%
PID_PDGFRB_PATHWAY	127	-0.237838	-0.877892	0.608392	0.776371	1	4524	tags=32%, list=22%, signal=41%
PID_NEPHRIN_NEPH1_PATHWAY	31	-0.257785	-0.867938	0.650943	0.786474	1	4942	tags=39%, list=24%, signal=51%
PID_LPA4_PATHWAY	15	-0.314898	-0.862202	0.632517	0.78723	1	95	tags=13%, list=0%, signal=13%
PID_IL3_PATHWAY	27	-0.298142	-0.860704	0.596529	0.779703	1	5516	tags=52%, list=27%, signal=71%
PID_S1P_S1P1_PATHWAY	21	-0.297912	-0.85198	0.674817	0.78621	1	3070	tags=29%, list=15%, signal=34%
PID_ERBB2_ERBB3_PATHWAY	44	-0.233089	-0.848062	0.711009	0.783748	1	4986	tags=36%, list=24%, signal=48%
PID_TXA2PATHWAY	57	-0.258759	-0.847055	0.648515	0.775411	1	2643	tags=26%, list=13%, signal=30%
PID_LKB1_PATHWAY	47	-0.22731	-0.841046	0.736211	0.776796	1	3743	tags=28%, list=18%, signal=34%
PID_LIS1_PATHWAY	28	-0.256204	-0.832344	0.693396	0.783119	1	2301	tags=25%, list=11%, signal=28%
PID_SMAD2_3PATHWAY	17	-0.30242	-0.795558	0.694672	0.843609	1	5510	tags=47%, list=27%, signal=64%
PID_S1P_S1P2_PATHWAY	24	-0.259802	-0.793478	0.748373	0.836573	1	4115	tags=33%, list=20%, signal=42%
PID_ARF6_DOWNSTREAM_PATHWAY	15	-0.271932	-0.782911	0.73913	0.844916	1	5231	tags=40%, list=26%, signal=54%
PID_IL1_PATHWAY	34	-0.242728	-0.771281	0.76392	0.856315	1	2787	tags=24%, list=14%, signal=27%
PID_PRL_SIGNALING_EVENTS_PATHWAY	23	-0.252529	-0.76357	0.776256	0.859871	1	2476	tags=22%, list=12%, signal=25%
PID_TNF_PATHWAY	46	-0.227566	-0.756997	0.750547	0.86052	1	2933	tags=26%, list=14%, signal=30%
PID_RAC1_PATHWAY	53	-0.207574	-0.723076	0.837587	0.908791	1	2491	tags=17%, list=12%, signal=19%
PID_FAS_PATHWAY	38	-0.200109	-0.703061	0.881642	0.928545	1	2450	tags=21%, list=12%, signal=24%
PID_FANCONI_PATHWAY	46	-0.289704	-0.692852	0.763441	0.93368	1	3828	tags=28%, list=19%, signal=35%
PID_ARF_3PATHWAY	19	-0.198403	-0.635386	0.94508	0.995191	1	1502	tags=16%, list=7%, signal=17%
PID_EPHRINB_REV_PATHWAY	30	-0.192725	-0.633008	0.907091	0.986599	1	4368	tags=37%, list=21%, signal=47%
PID_ATR_PATHWAY	39	-0.240308	-0.624946	0.775824	0.983852	1	1396	tags=13%, list=7%, signal=14%
PID_IL27_PATHWAY	26	-0.237663	-0.624434	0.855769	0.973558	1	5320	tags=42%, list=26%, signal=57%
PID_ERBB4_PATHWAY	38	-0.183779	-0.622501	0.963768	0.964788	1	4986	tags=37%, list=24%, signal=49%
PID_CD8_TCR_PATHWAY	53	-0.209938	-0.617751	0.829843	0.958826	1	2194	tags=19%, list=11%, signal=21%
PID_NCADHERIN_PATHWAY	33	-0.186814	-0.613978	0.967391	0.952024	1	4275	tags=30%, list=21%, signal=38%
PID_E2F_PATHWAY	70	-0.197397	-0.590311	0.870159	0.961591	1	5052	tags=34%, list=25%, signal=45%
PID_DNA_PK_PATHWAY	16	-0.213952	-0.571498	0.942116	0.96403	1	5519	tags=44%, list=27%, signal=60%
PID_IL6_7_PATHWAY	47	-0.180731	-0.550524	0.91757	0.965994	1	2450	tags=19%, list=12%, signal=22%
PID_PLK1_PATHWAY	45	-0.143243	-0.373394	0.963554	0.998103	1	3578	tags=16%, list=17%, signal=19%
